# Supplementary material for: Reproduction of super-multicomponent self-assembled structures and their functionality using coarse-grained molecular simulation – the example of cleansing agents
Source: Royal Society of Chemistry journal article supplement (doi:10.1039/d2me00188h), 2023-01-01
Supplement: d2me00188h1.pdf [file d2me00188h1.pdf]

## Support Information

### **Reproduction of super-multicomponent self-assembled structures and their functionality using coarse-grained molecular simulation - the example of cleansing foams**

Takahiro Yokoyama, Hideki Miwake, Masugu Hamaguchi, Ryouichi Nakatake, and  
Noriyoshi Arai

#### **S1. Simulation model**

In this study, we adopted a coarse-grained method to eliminate the complex effects including a chemical reaction. Mesoscopic representation of the molecular components of cleansing foams are chosen in this simulation. Since there are an enormous amount of ingredients used in cosmetic products, we modeled commonly used molecules, as shown in Fig. S1. We modeled 13 molecules including 8 surfactants, 3 polyols, citric acid, and water (as solvent).

(a) Surfactant model

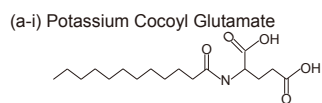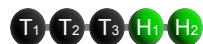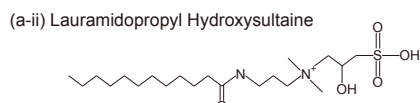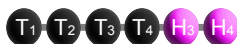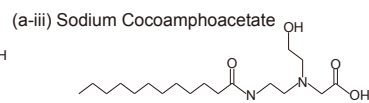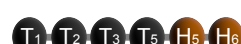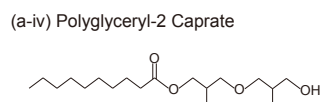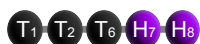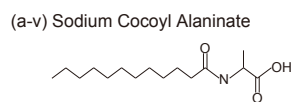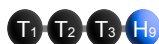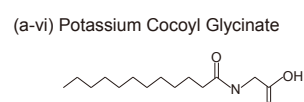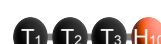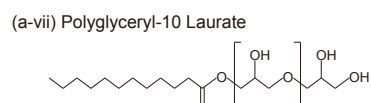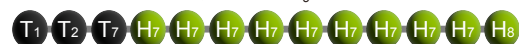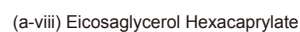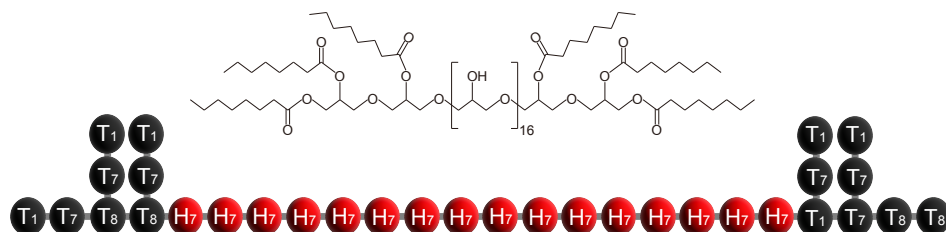

(b) Polyol model

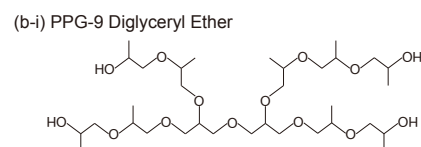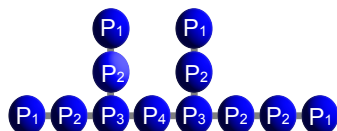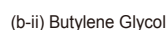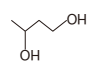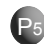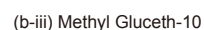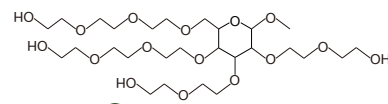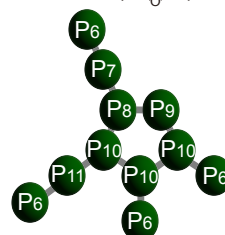

(c) pH adjuster model

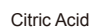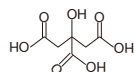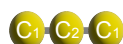

(d) Solvent model

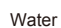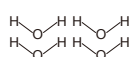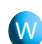

Fig. S1 Coarse-grained simulation models of the molecules we used in this study. Those molecules include (a) Surfactants, (b) polyols, (c) pH adjuster, and (d) solvent.

## S2. Solubility parameters $\delta$ , and molar volumes of DPD beads

The interaction parameters of the mesoscopic models, solubility parameters and molar volumes are calculated from J-OCTA simulation software [S1]. Table S2 shows the interaction parameters for all DPD beads we used in this study.

Table S2 Interaction parameters of DPD bead  $i$ .  $\delta$  and  $V_{seg}$  describe solubility parameter and molar volume respectively.

| Label    | $\delta$ | $V_{seg}$ |
|----------|----------|-----------|
| $W$      | 40.6     | 72.1      |
| $T_1$    | 15.8     | 58.1      |
| $T_2$    | 16.0     | 58.1      |
| $T_3$    | 24.6     | 72.1      |
| $T_4$    | 24.9     | 73.1      |
| $T_5$    | 25.1     | 59.1      |
| $T_6$    | 22.5     | 102.1     |
| $T_7$    | 23.2     | 74.1      |
| $T_1$    | 15.8     | 58.1      |
| $H_1$    | 33.4     | 75.1      |
| $H_2$    | 30.8     | 74.1      |
| $H_3$    | 27.6     | 89.1      |
| $H_4$    | 35.0     | 96.1      |
| $H_5$    | 34.5     | 61.1      |
| $H_6$    | 32.9     | 60.1      |
| $H_7$    | 26.6     | 90.1      |
| $H_8$    | 32.9     | 76.1      |
| $H_9$    | 30.4     | 89.1      |
| $H_{10}$ | 33.5     | 75.1      |
| $P_1$    | 31.4     | 60.1      |
| $P_2$    | 22.8     | 74.1      |
| $P_3$    | 23.0     | 90.1      |
| $P_4$    | 23.4     | 74.1      |
| $P_5$    | 32.2     | 90.1      |
| $P_6$    | 26.5     | 76.1      |
| $P_7$    | 22.8     | 60.1      |
| $P_8$    | 22.6     | 60.1      |
| $P_9$    | 22.3     | 76.1      |
| $P_{10}$ | 22.6     | 60.1      |
| $P_{11}$ | 22.6     | 60.1      |
| $C_1$    | 32.9     | 60.1      |
| $C_2$    | 34.7     | 76.1      |

### S3. Validity of Simulation model

To verify the validation of our coarse-grained simulation models using J-OCTA simulation software [S1], we conducted simulations to reproduce the morphology of cleansing agents whose morphologies are already clarified by experiments. Fig S3 shows the simulation results of four different cleansing agents whose morphologies are known from the past experiments [S2]. The morphologies of four cleansing agents (1)-(4) were determined as (1), (2) have micellar phase, and (3), (4) have lamellar phase respectively. We chose our simulation parameters such as number density  $\rho$  and system size based on this simulation. As a result, we confirmed that our coarse-graining method can reproduce the same phase morphologies as experimental ones when  $\rho = 5$ , and system size is  $30 \times 30 \times 30 r_C^3$ .

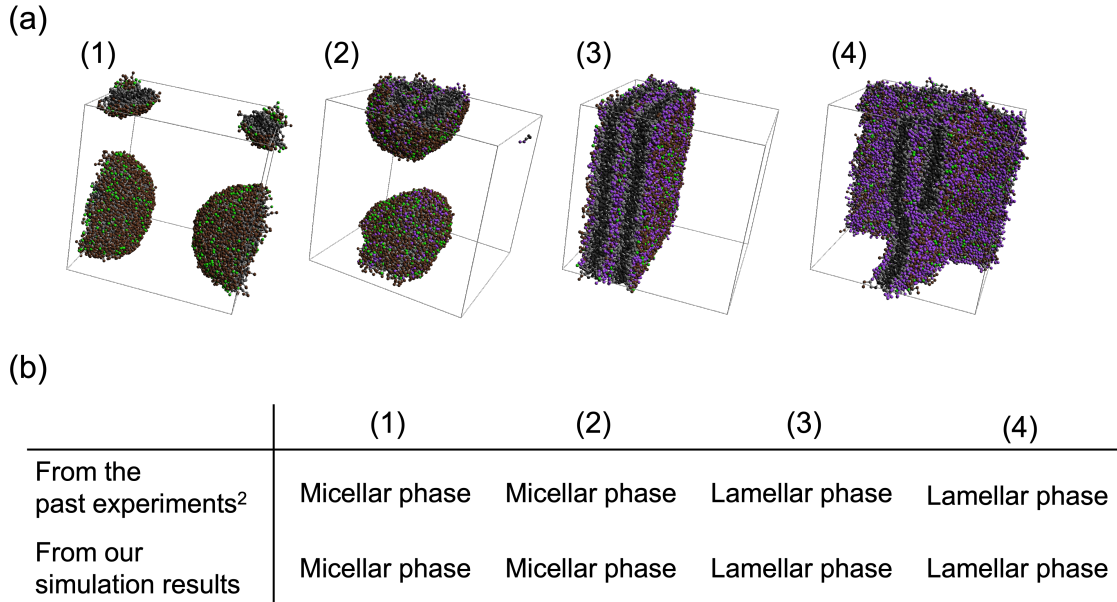

Fig. S3 (a) The simulation results of four different cleansing agent morphologies. (b) The phase morphologies of cleansing agents obtained from experiments and coarse-grained simulations.

### References

- [S1] JSOL Corporation, J-OCTA, <https://www.j-octa.com>.  
[S2] Shiseido Co Ltd, JP Patent 4911752B2 (2012).
